# Supplementary material
Source: ML conference proceedings conference paper supplement (https://openaccess.thecvf.com/content/ICCV_2017/html/Fanello_Low_Compute_and_ICCV_2017_paper.html)
Supplement: Supplementary file 1 [file Fanello_Low_Compute_and_ICCV_2017_supplemental.pdf]

# Low Compute and Fully Parallel Computer Vision with HashMatch

Sean Ryan Fanello<sup>1\*</sup> Julien Valentin<sup>1\*</sup> Adarsh Kowdle<sup>1</sup> Christoph Rhemann<sup>1</sup>  
 Vladimir Tankovich<sup>1</sup> Carlo Ciliberto<sup>2</sup> Philip Davidson<sup>1</sup> Shahram Izadi<sup>1</sup>

perceptiveIO<sup>1</sup> University College London<sup>2</sup>

## 1. Pseudocode for Least squares

For completeness, we report here the pseudocode for the algorithm proposed in Sec. 3.2 and used in the experiments of this work where we used least-squares as both the loss function  $\mathcal{L}$  and the dissimilarity  $\mathcal{D}$  in Eq. (7). In this setting, Eq. (7) becomes

$$\begin{aligned} \min_{W, Z, B} \quad & \|BZ - Y\|^2 + \lambda|W|_1 + \eta\|Z\|^2 + \gamma\|XW - B\|^2 \\ \text{s.t.} \quad & \|B\|_\infty \leq \mu. \end{aligned} \quad (1)$$

We can therefore apply the PALM implementation of HashMatch described in Sec. 3.2 to optimize over  $(W_t, B_t, Z_t)$  by iteratively performing the descent steps at Eq. (8,9,11), updating one variable at the time while keeping the other fixed. The pseudocode for HashMatch considered in this work is reported in Alg. 1 in MATLAB notation.

---

### Algorithm 1 HASHMATCH

---

**Input:**  $\mathbf{X} \in \mathbb{R}^{m \times n}$ ,  $\mathbf{Y} \in \mathbb{R}^{m \times d}$ ,  $\lambda, \eta, \gamma, \mu > 0$ .

**Stopping Conditions:** max iterations  $T$ , step threshold  $\epsilon$

**Initialize:**

$\mathbf{B}_1$  uniform random sample entries from  $\{-\mu, \mu\}$

$\mathbf{W}_1, \mathbf{Z}_1$  initialization from a random distribution

Step Sizes:

$$\sigma_1 = \frac{1}{2\gamma\|\mathbf{X}\|_{op}^2}, \sigma_2 = \frac{1}{2\eta^2\mu + 2\gamma}, \sigma_3 = \frac{1}{2\mu^2m^2 + 2\eta}$$

**For**  $t = 0$  **to**  $T$

Update  $\mathbf{Z}$

$$Z_{t+1} = Z_t - 2\sigma_3(B_t^\top(B_t Z_t - Y) + \eta Z_t)$$

Update  $\mathbf{W}$

$$W_{t+1} = W_t - 2\sigma_1\gamma(X^\top X W_t - X^\top B_t)$$

$$W_{t+1} = W_{t+1} - \sigma_1\lambda \text{SIGN}(W_{t+1})$$

$$W_{t+1}(\text{ABS}(W_{t+1}) \leq \sigma_1\lambda) = 0$$

Update  $\mathbf{B}$

$$\begin{aligned} \tilde{B} = B_t - 2\sigma_2(B_t Z_{t+1} Z_{t+1}^\top - Y Z_{t+1}^\top) \\ + 2\sigma_2\gamma(X W_{t+1} - B_t) \end{aligned}$$

$$\bar{B} = \tilde{B} - \mu \text{SIGN}(\tilde{B})$$

$$\bar{B}(\text{ABS}(\bar{B}) \leq \mu) = 0$$

$$B_{t+1} = \bar{B} - \bar{B}$$

**If**  $\|(W_t, B_t, Z_t) - (W_{t+1}, B_{t+1}, Z_{t+1})\| \leq \epsilon$   
 BREAK

**End**

**End**

---

\* Authors equally contributed to this work.
